# Supplementary material for: Understanding the association of Escherichia coli with diverse macroalgae in the lagoon of Venice
Source: PubMed Central journal article supplement (PMC4455311; doi:10.1038/srep10969), 2015-06-04

## **Understanding the association of *Escherichia coli* with diverse macroalgae in the lagoon of Venice**

Grazia M. Quero<sup>1</sup>, Luca Fasolato<sup>2</sup>, Carla Vignaroli<sup>3</sup>, Gian Marco Luna<sup>1,\*</sup>

<sup>1</sup>Institute of Marine Sciences (CNR – ISMAR), National Research Council, Venezia, Italy,

<sup>2</sup>Department of Comparative Biomedicine and Food Science, University of Padova, Italy,

<sup>3</sup>Department of Life and Environmental Sciences, Polytechnic University of Marche, Ancona, Italy

\*Corresponding author

Gian Marco Luna

National Research Council – Institute of Marine Sciences (CNR – ISMAR)

Castello 2737/f – Arsenale Tesa 104

30122 Venezia, Italy

Tel. +39 041 2407993

email: gianmarco.luna@ve.ismar.cnr.it

**Table S1.**

**Figures S1 – S2 – S3 – S4 – S5 – S6.**

**Supplementary Table S1.** Results of the three-way ANOVA test on the abundance of *E. coli* in the study area. SS= sum of squares; DF = degrees of freedom; MS = mean square; F = statistic F. Reported are also the results of the Cochran's test performed prior to the ANOVA analysis to test the homogeneity of variance.

Transform: Ln(X+1)

Cochran's Test

C = 0.3267 (P < 0.01)

| Source       | SS       | DF  | MS       | F     | P      |
|--------------|----------|-----|----------|-------|--------|
| SITE         | 173.6255 | 1   | 173.6255 | 17.98 | 0.0240 |
| TIME         | 183.7927 | 4   | 45.9482  | 3.45  | 0.0428 |
| HABITAT      | 28.6240  | 3   | 9.5413   | 34.52 | 0.0001 |
| SI × TI      | 64.2726  | 4   | 16.068   | 1.63  | 0.2311 |
| SI × HA      | 28.9691  | 3   | 9.6564   | 34.93 | 0.0001 |
| TI × HA      | 160.0020 | 12  | 13.3335  | 48.24 | 0.0001 |
| SI × TI × HA | 118.5239 | 12  | 9.8770   | 35.73 | 0.0001 |
| RES          | 22.1131  | 80  | 0.2764   |       |        |
| TOT          | 779.9229 | 119 |          |       |        |

**Supplementary Figure S1.** Abundance of *E. coli* (average  $\pm$  standard error) in the Sette Martiri sampling site during low and high tide regime. Data are expressed as CFU g<sup>-1</sup> (for macroalgae) or CFU ml<sup>-1</sup> (for water). § = no *E. coli* growth was observed. The *E. coli* abundance in water on the 23 May during high tide is  $0.06 \pm 0.05$  CFU/ml.

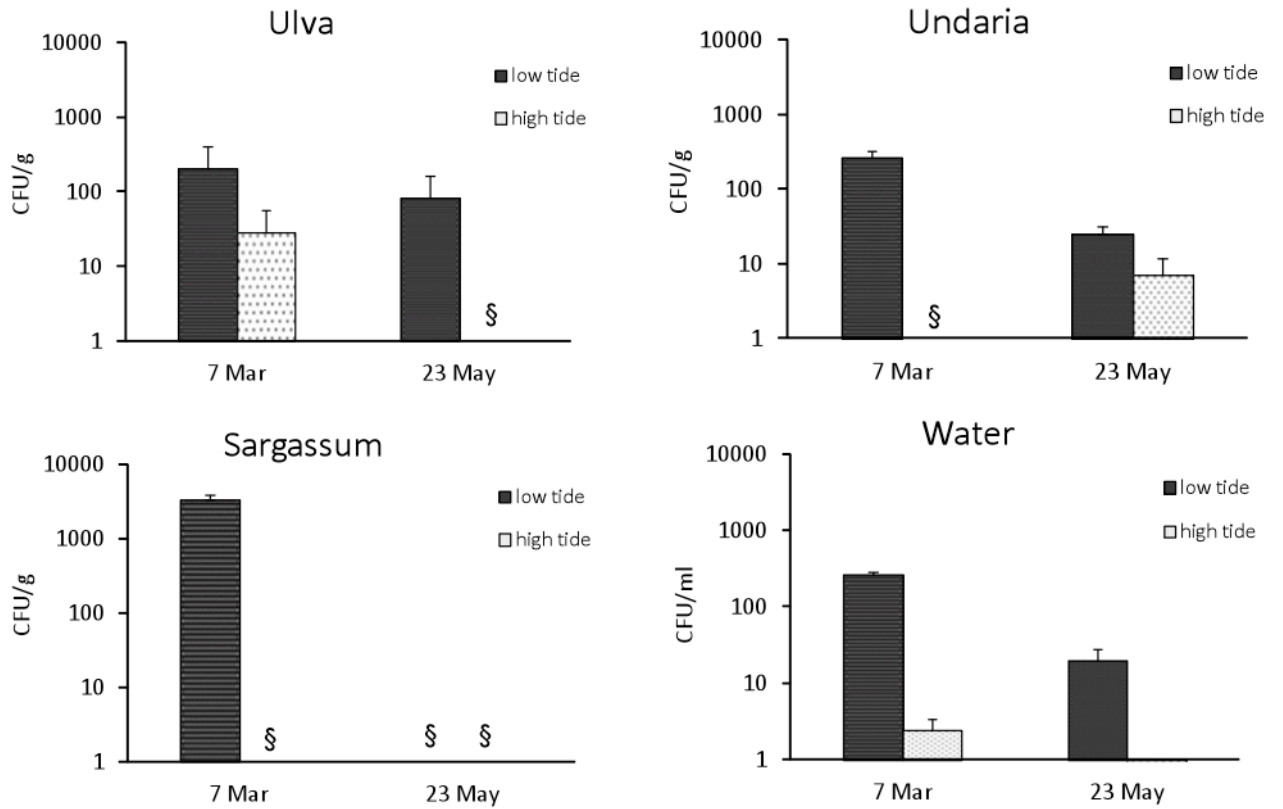

**Supplementary Figure S2.** Cumulative distribution (expressed as percentage, %) of the *E. coli* phylogroups in the entire set of isolates (macroalgae and water).

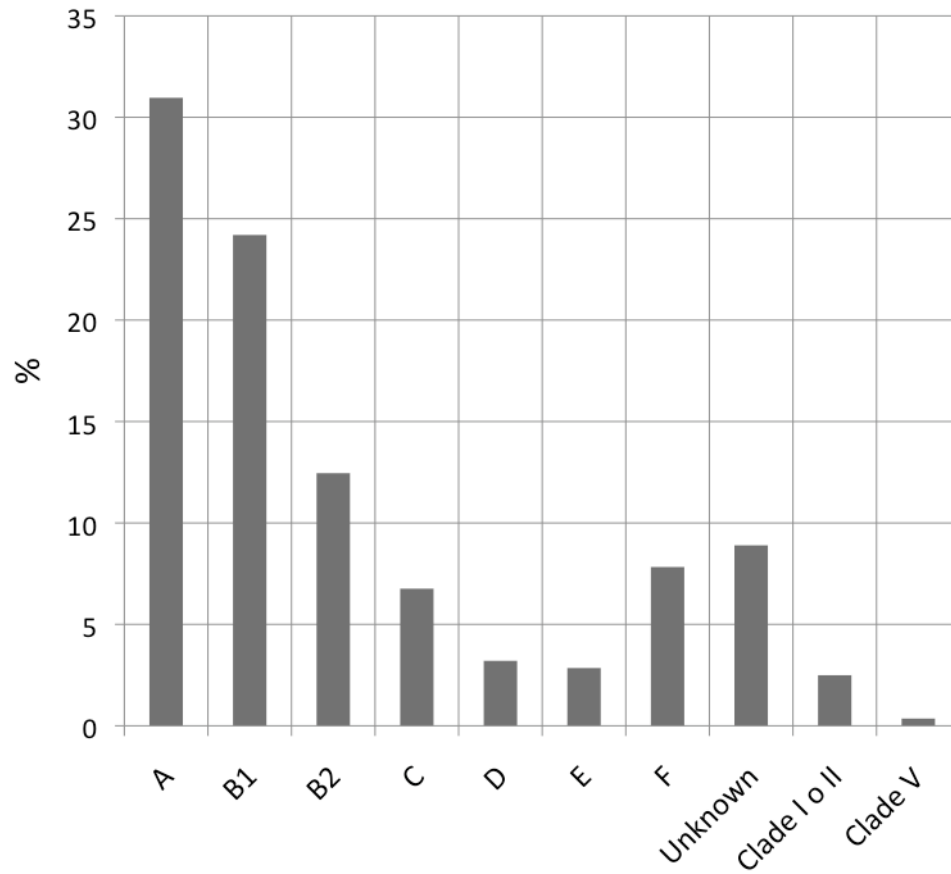

**Supplementary Figure S3.** Growth curves on macroalgal extracts for representative *E. coli* isolates. A and D= strain #223 isolated from *Ulva*; B and E = strain #349 isolated from *Sargassum*; C = strain #306 isolated from *Undaria*, F = strain #360 isolated from *Ulva*. Panel A, B and C refer to *E. coli* isolates growth at 10°C; panels D, E and F to *E. coli* growth at 37°C. Triangles refer to the growth on the *Undaria* medium, while rhombuses to the growth on *Sargassum* and squares on *Ulva*. The data are averages  $\pm$  standard errors of the averages. OD600nm = optical density at 600 nm.

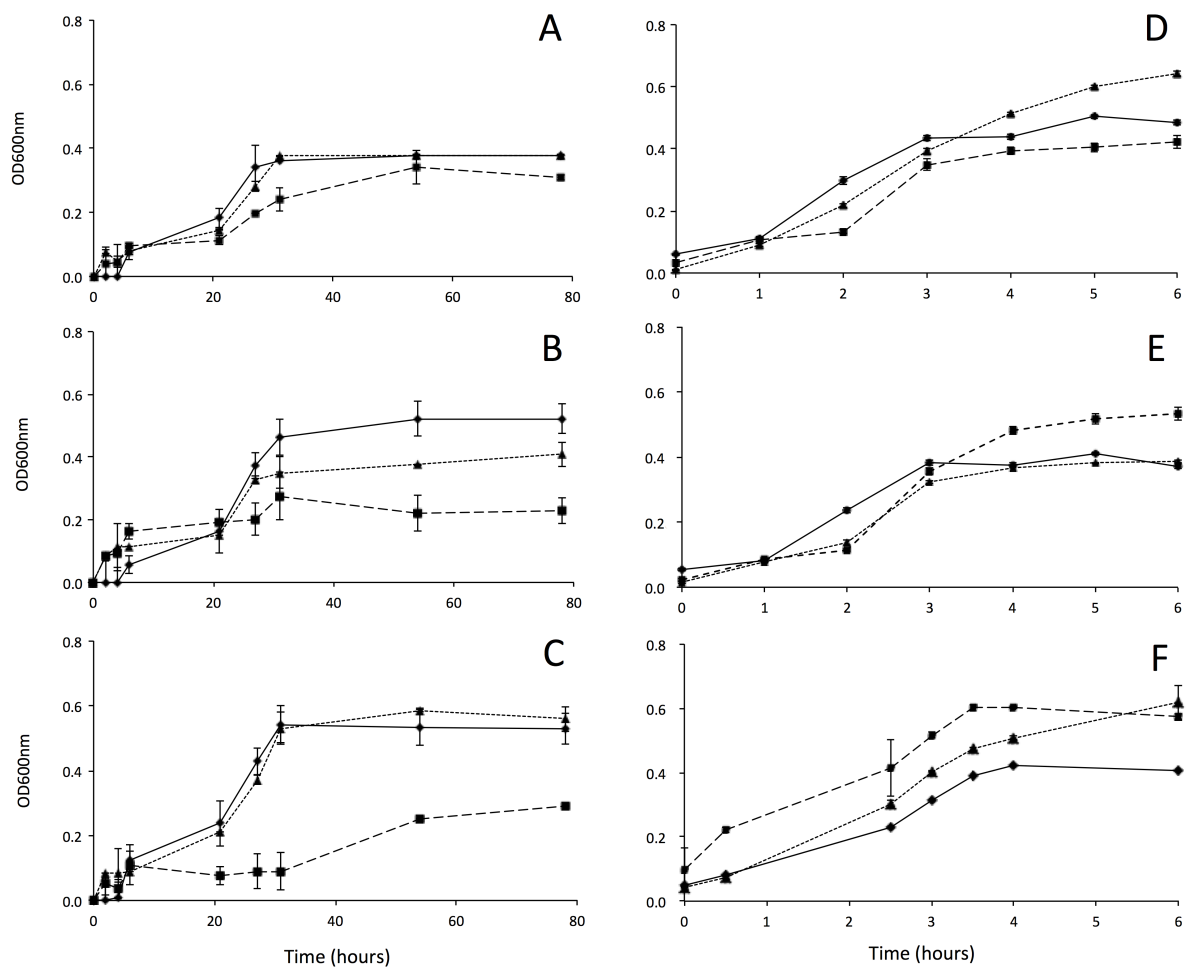

**Supplementary Figure S4.** Dendrograms showing the genetic diversity of the *E. coli* typed in this study, as divided per habitat (the three macroalgae and the overlying water). The top axis shows the percent similarity among the genotypes, as indicated by the Dice correlation coefficients. Numbers on the left side indicate the isolate's reference number.

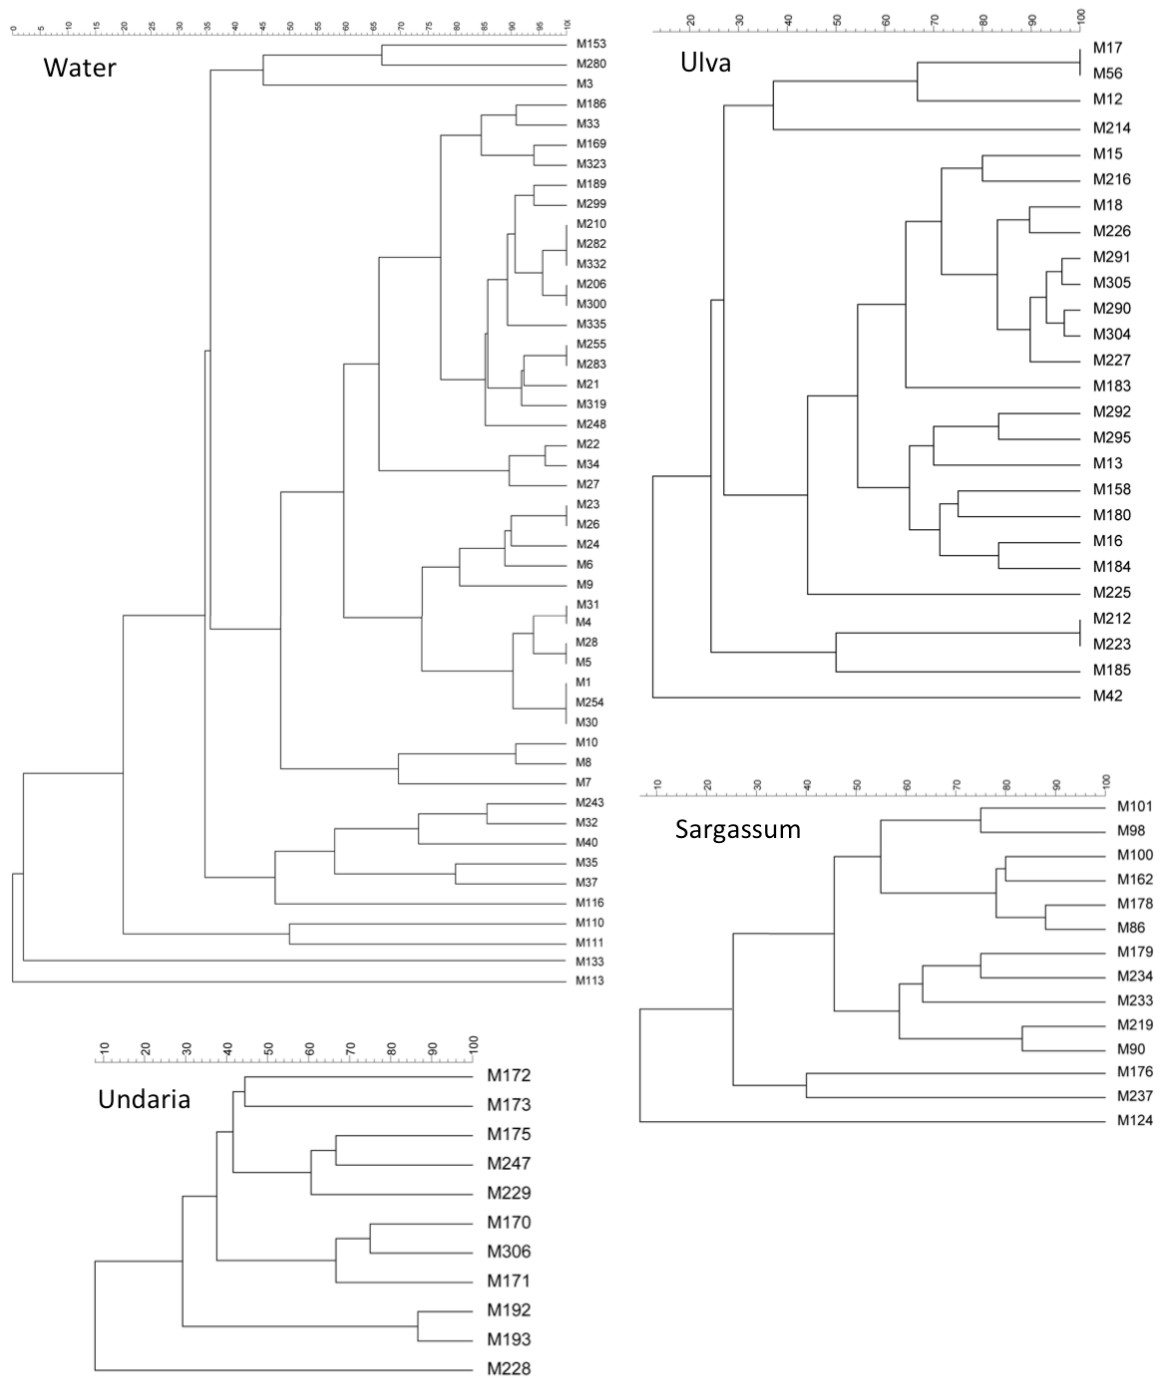

**Supplementary Figure S5.** Dendrogram showing the genetic diversity of all *E. coli* isolates typed in this study. The top axis shows the percent similarity among the genotypes, as indicated by the Dice correlation coefficient. Numbers on the right side indicate the isolate reference number. Reported on the right are also the habitat type (*Undaria*, *Ulva*, *Sargassum* or water), the sampling time (Feb = February; Mar = March; or May) and the sampling site.

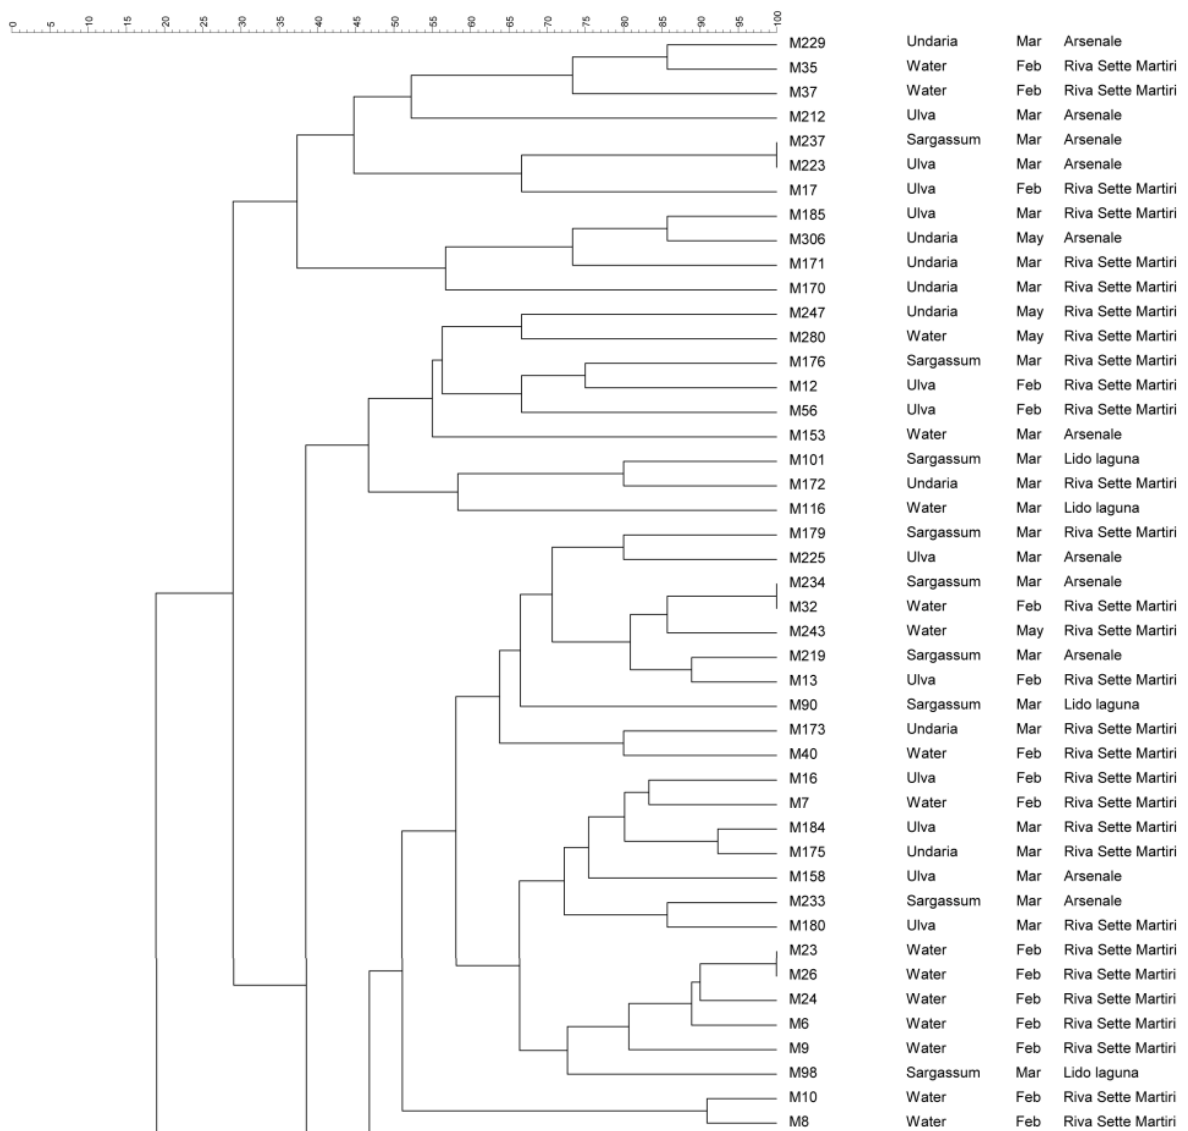

(continued on the next page)

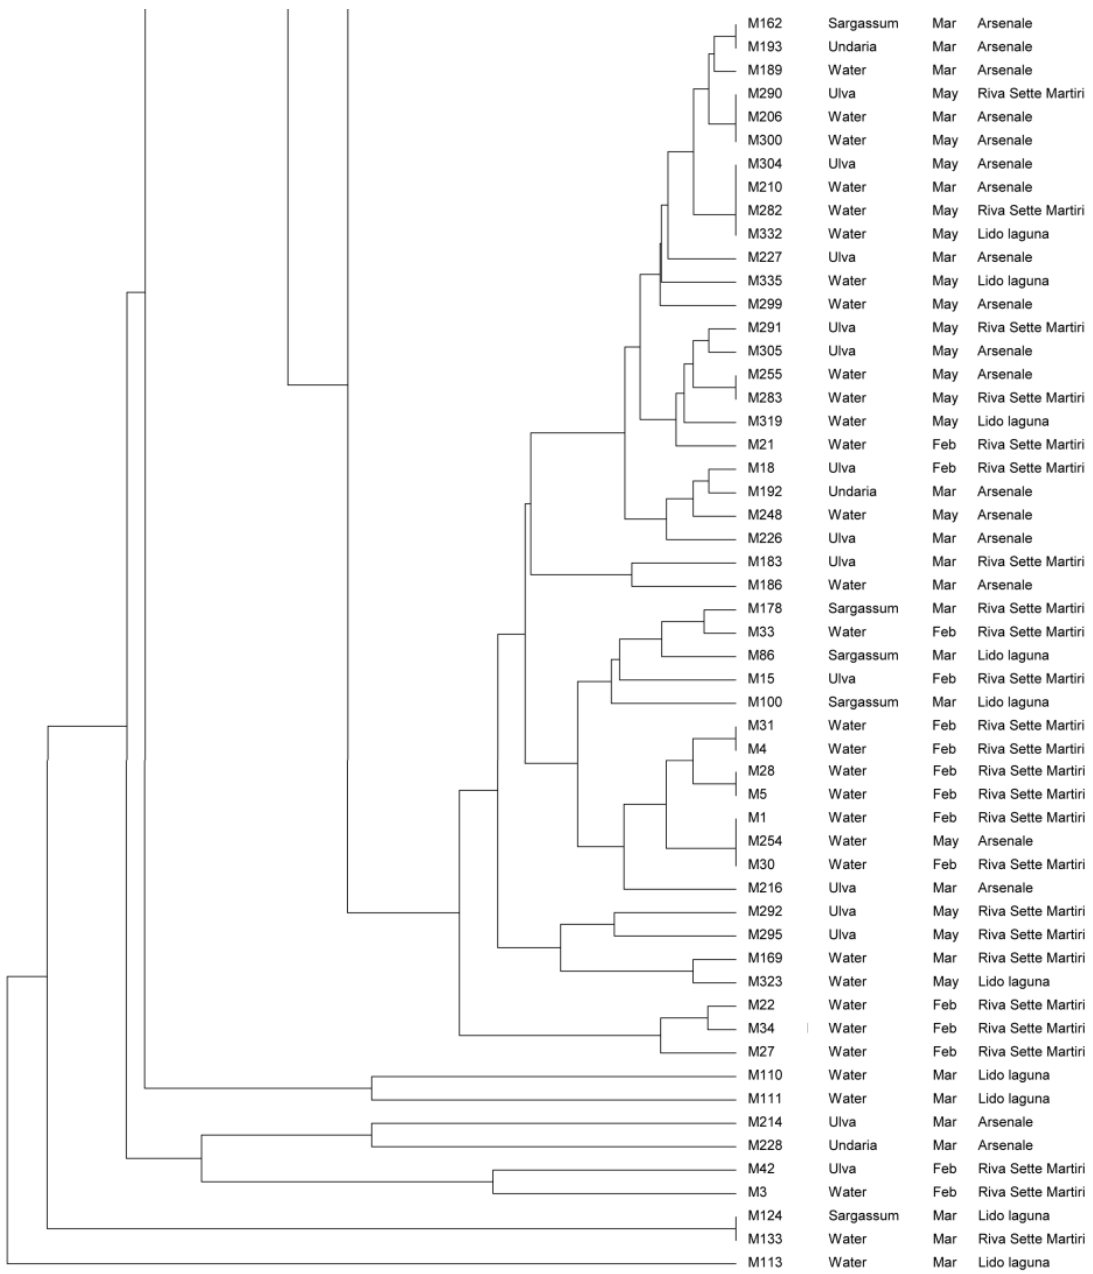



**Supplementary Figure S6.** Examples of large macroalgal growth and colonization around the historical centre of Venice. All photographs from this figure were taken by Gian Marco Luna and Grazia Marina Quero.

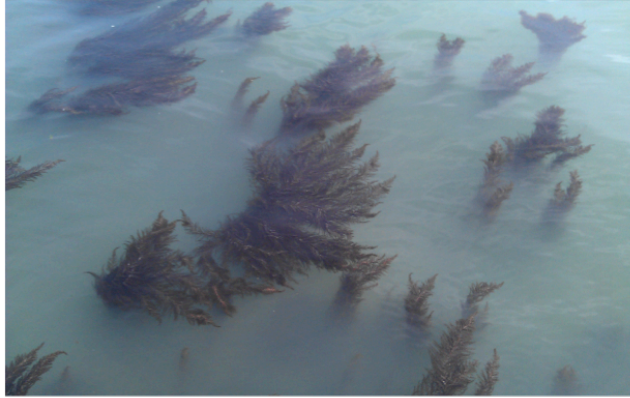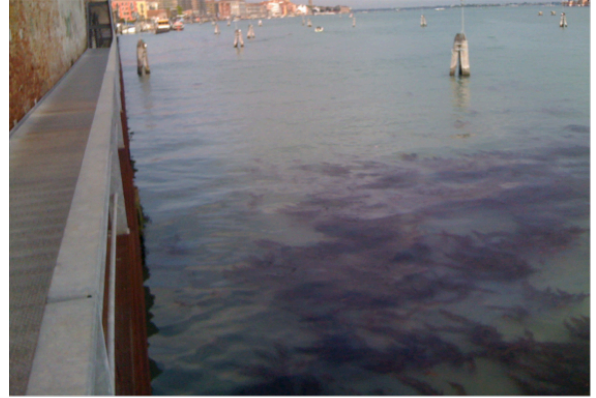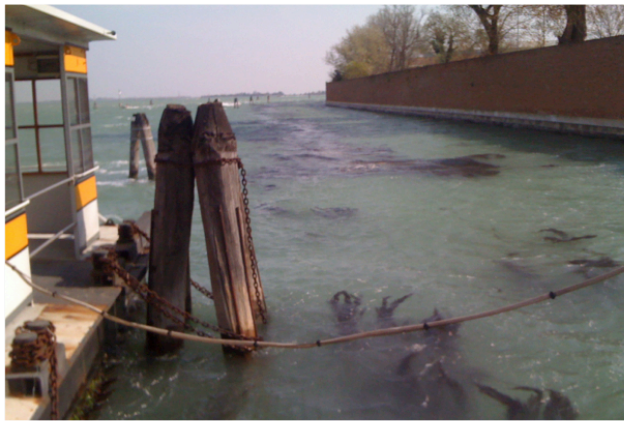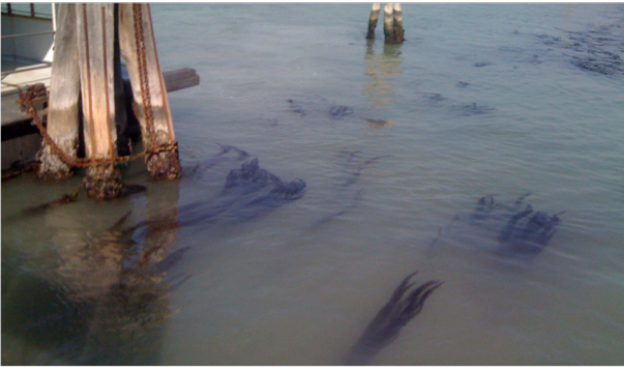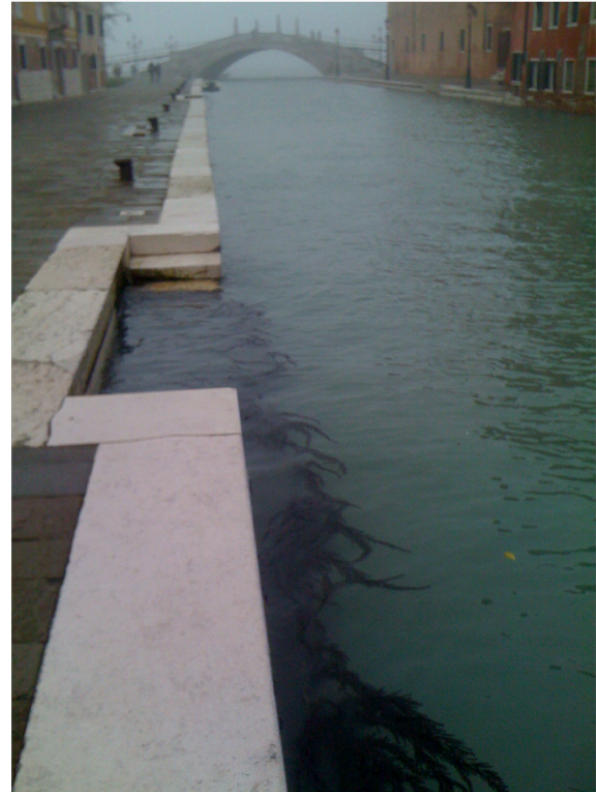

Supplement: srep10969-s1.pdf [file srep10969-s1.pdf]
